# Supplementary material for: Computational methods for the ab initio identification of novel microRNA in plants: a systematic review
Source: PeerJ Comput Sci. 2019 Nov 11;5:e233. doi: 10.7717/peerj-cs.233 (PMC7924660; doi:10.7717/peerj-cs.233)
Supplement: Table S1 [file peerj-cs-05-233-s001.xlsx]

## Sheet: Sheet1
			Ab-Initio Plant miRNA Prediction - Systematic Review
	Primary Studies	Article Type	Data	Dataset Source	Number of Species Used	Negative Datasets	Input	Types of Features				Feature Selection Methods	Types of ML models		Validation	Experimental Validation	Prediction output	Key Results								Future Work
								Sequence	Structural	Thermodynamic/Stability	Other		Discriminative	Probabilistic				Precison	Recall	F1	Specificity	Geometric Mean	Accuracy	AUC	Notes
1	PlantMiRNAPred: Efficient classification of real and pseudo plant pre-miRNAs, 2011, Xuan et al.	Journal Article	Plant	miRBase 14, ﻿Phytozome 6 database	29	Protien coding regiond of A.thaliana and G.max genomes	pre-miRNA	17	64 triplet	34		Considering information gain and feature redundancy	SVM - RBF Kernal				pre-miRNA		91.93		97.84	94.84	94.39		Accuracy values for 68 selected features and selected samples.
2	Accurate Plant MicroRNA Prediction Can Be Achieved Using Sequence Motif Features, 2016, Yousef et al.	Journal Article	Plant	miRBase 20, 21	5 species related to Brassicaceae and training data from [1]	Samples from [1]	pre-miRNA	existing; motif features	existing	existing		Using SVM-RFE (Recursive feature elemination) implemented in WEKA, selected top 60 ranked features.	SVM - RBF Kernal		5-fold CV		pre-miRNA		98.8		100		99.48	0.994	Accuracies for the combined feature set of traditional and motif features.
3	Using a Support Vector Machine to identify pre-miRNAs in soybean (Glycine max) introns, 2010, Silla et al.	Conference Proceeding	Plant	Plant MicroRNA Database, deepBase, Phytozome	131 Glycine max, 199 Arabidopsis thaliana and 100 Medicago truncatula	175 Arabidopsis thaliana snoRNA sequences from deepBase2 and 225 RNA sequences randomly generated	pre-miRNA	17		12		N/A	SVM - RBF Kernal		5-fold CV		pre-miRNA		89		95		92		Results from validation set	Biological experiments with sequences obtained as pre-miRNA will be conducted to discover the mature miRNA and to identify the stage of plant development in which it is expressed. Also identify miRNAs targets in order to establish the role of miRNA in gene expression organism and to apply the gained knowledge to make plants more resistant to biotic and abiotic stresses like drought, rust, pathoge…
4	Prediction of plant pre-microRNAs and their microRNAs in genome-scale sequences using structure-sequence features and support vector machine, 2014, Meng et al.	Journal Article	Plant	miRBase 19		From coding regions of 3 species	pre-miRNA and mature miRNA	20	96	29		Using Back SVM-RFE, 47/152 features were selected	SVM		5-fold CV		pre-miRNA and mature miRNA		95.5		98.82	97.16	97.16			Develop better classification models that can identify miRNAs with low and specific expression levels.
5	High-resolution experimental and computational profiling of tissue-specific known and novel miRNAs in Arabidopsis, 2012, Breakfield	Journal Article	Plant	miRBase 16, ﻿NCBI Sequence Read Archive	Arabidopsis	From intergenic or intronic genomic locations	small RNA				15 including all types	N/A		Naïve Baye's	4-fold CV	RT-PCR etc.	Mature miRNA vs nc-RNA		91.7		99.9					Examine additional classes of small RNAs in the ﻿data sets, because they can also be expected to exhibit distinct ﻿spatio-temporal expression patterns
6	A naive Bayesian classifier for identifying plant microRNAs, 2016, Douglass et al.	Journal Article	Plant	miRBase 21, ﻿Gene Expression Omnibus (GEO)	4	smRNA sequences remaining after known miRNA filtering	small RNA					N/A		Naïve Baye's	5-fold CV	RT-PCR	mature miRNA							0.998	Highest value for out of four plants (Arabidopsis).
7	plantMirP: an efficient computational program for the prediction of plant pre-miRNA by incorporating knowledge-based energy features, 2016, Yao et al.	Journal Article	Plant	miRBase 21, ﻿EnsemblPlants database v18	9	From coding regiong of 5 species	pre-miRNA				Including all types	Selected subsets of features (based on types of features) to check the impact of those features	SVM - RBF Kernal		10-fold CV		pre-miRNA		92.61		98.88		96.56	0.9885	AUC for 10-fold CV out of 4,6,8.	enhance the prediction performance of plantMirP by optimizing the feature set and improving the algorithm in subsequent work
8	microRPM: a microRNA prediction model based only on plant small RNA sequencing data, 2018, Tseng et al.	Journal Article	Plant	miRBase 21, Gene Expression Omnibus, TAIR, RGAP	Arabidopsis and Rice		small RNA	1	183	1		Tested with different combinations of features (based on type)	SVM		5-fold CV	RT-PCR	mature miRNA	95.22	98.15		95.07		96.61		Using Arabidopsis with reference-not-required model.
9	Plant MicroRNA Prediction by Supervised Machine Learning Using C5.0 Decision Trees, 2012, Williams et al.	Journal Article	Plant	miRBase 18, ﻿TIGR Plant Transcript Assemblies	18	From Expressed Sequence Tags (EST) of 18 species	mature miRNA	22	4	3		N/A	Decision Tree		Leave-one-out		mature miRNA		84.08		98.53
10	Identification of novel and candidate miRNAs in rice by high throughput sequencing, 2008, Sunkar et al.	Journal Article	Plant	miRBase 9, ﻿TIGR Rice Genome Annotation Database	Rice	Rice coding sequences from TIGR	small RNA	4 to 9-mer sequence motifs				Using weights from SVM, to find the top set of features (<20 features)	SVM - Linear		10-fold CV	Nothern analysis	mature miRNA								No accuracy values.
11	Sequence Motif-Based One-Class Classifiers Can Achieve Comparable Accuracy to Two-Class Learners for Plant microRNA Detection, 2015, Yousef et al.	Journal Article	Plant	miRBase 20, 21	8	From [1]	pre-miRNA	n-grams and motifs				Using SVM-RFE (Recursive feature elemination) implemented in WEKA, selected top 60 ranked features.	SVM and Kmeans		5-fold CV		mature miRNA						91.4		OC-Kmeans accuracy for one class.	Create a new negative dataset and add additional features to the one-class model developed here. Investigate methods for feature selection for one-class classification.
12	Identification of microRNA precursors based on random forest with network-level representation method of stem-loop structure, 2011, Xiao et al.	Journal Article	Evaluation: plant+virus	miRBase 14	All miRBase 14	From previous work (Human data)	pre-miRNA		24 network parameters of stem-loop structure			N/A	Random Forest		select subset for training and remaining for testing and repeat x100		pre-miRNA		87.3		91.1		97.6	0.956	SE, SP and ROC are for animal dataset.
13	miRHunter: A Tool for Predicting microRNA Precursors Based on Combined Computational Method, 2017, Koh and Kim	Journal Article	Animal + Plant	miRBase 21	miRBase21 excluding virus	Pseudo hairpins form microPred	pre-miRNA	17		12		N/A	SVM - RBF Kernal		5-fold CV		pre-miRNA		96		94.68				Results on three categories as animal, plant and overall. These values are for plants only (average values)	Incorporate advanced features; select most discriminative set of features
14	MiRPara: a SVM-based software tool for prediction of most probable microRNA coding regions in genome scale sequences, 2011, Wu et al.	Journal Article	Animal + Plant	miRBase 13	All miRBase 13	Random start sequences; identical to real miRNA but start position is shifted by 5nt	pri-miRNA	6,5,5/mature,pre,pri-mirna	9,5,5/mature,pre,pri-mirna	1,1,1/mature,pre,pri-mirna	30 other features	Tested for the 10 highest raninking features	SVM		Cross-validation 2,50,100		mature miRNA regions						80
15	miRClassify: An advanced web server for miRNA family classification and annotation, 2014, Zou et al.	Journal Article	Animal + Plant	miRBase 19	All miRBase 19		mature miRNA	4096	32 triplet			Tested on different feature sets	Random Forest		10-fold CV		mature miRNA and their family								miRNA identification and miRNA family identification. Only accuracies for family ID classifier given.	Extract the miRNA or miRNA clusters from long DNA segment. Computationally finding the mature part from the precursor.
16	Improved Pre-miRNA Classification by Reducing the Effect of Class Imbalance, 2015, Zhong et al.	Journal Article	Animal + Plant	Previous studies (miRBase 12, 14, 17)	From previous studies	Previous methods	pre-miRNA	81	49	9		N/A	SVM		5-fold CV		pre-miRNA		93.37		97.91	95.61			Since negative set >> positive set, assumed accuracy=SP. Results for merged dataset.
17	mirExplorer: Detecting microRNAs from genome and next generation sequencing data using the AdaBoost method with transition probability matrix and combined features, 2011, Guan et al.	Journal Article	Animal + Plant	miRBAse 12		From protien coding regions (from previous studies)	pre-miRNA				misc. covering all types	N/A	ADABoost		Outer 10-fold CV		pre-miRNA and mature miRNA		94.32		97.11	96	97.54		Accuracy for plant and virus data. Others for cross-species data of 6 species for testing.
18	Mirnovo: genome-free prediction of microRNAs from small RNA sequencing data and single-cells using decision forests, 2017, Vitsios et al.	Journal Article	Animal + Plant	miRBase	15		mature miRNA				33 covering all types	N/A	Random Forest		10-fold CV		Mature miRNA						71.4-71.8		Accuracy for plant sequences. The model outputs Precision, SE and SP.
19	Identifying Essential Features for the Classification of Real and Pseudo MicroRNAs Precursors Using Fuzzy Decision Trees, 2010, Abu-halaweh and Harrison	Conference Proceeding	Animal + Plant	previous work (Rfam 5 etc.)	12	Human coding regions	pre-miRNA				Including all types	﻿FDT integrates two measures, Classification Ambiguity and Fuzzy Information Gain to identify the set of the most significant features	Fuzzy Dicision Tree				pre-miRNA		91.5		94.7		94.2		Values for w=7, a feature selection method.
20	HHMMiR: efficient de novo prediction of microRNAs using hierarchical hidden Markov models, 2009, Kadri et al.	Journal Article	Test data: plant	﻿microRNA registry v10.1, ﻿UCSC genome browser	2	Coding regions and random genomic segments from genome obtained by UCSC genome browser	pre-miRNA				4 parameters	N/A		Hierarchical HMM	10-fold CV		pre-miRNA		84		88				SE and SP based on 10-fold CV of human data. For Triplet-SVM dataset, 93.2 and 89.	Test more folding algorithms or use the probability distribution of a number of top scoring folding energy structures returned by this package.﻿Include evolutionary information, which will allow to assess the significance of conservation in predicting miRNA genes
	F1 Score = 2*(Precision*Recall)/(Precision+Recall)
	Geometric Mean = Sensitivity*Specificity
