# Supplementary material for: Computational methods for the ab initio identification of novel microRNA in plants: a systematic review
Source: PeerJ Comput Sci. 2019 Nov 11;5:e233. doi: 10.7717/peerj-cs.233 (PMC7924660; doi:10.7717/peerj-cs.233)
Supplement: Table S2 [file peerj-cs-05-233-s002.xlsx]

## Sheet: Sheet1
Ab-Initio Plant miRNA Prediction - Systematic Review
Publication Venue of the primary studies
Publication Venue	Type	Count
BMC Bioinformatics	Journal	4
Bioinformatics	Journal	2
IEEE Symposium on Computational Intelligence in Bioinfirmatics and Computational Biology	Conference	1
Journal of Biomedical Science and Engineering	Journal	1
BMC Plant Biology	Journal	1
Nucleic Acids Research	Journal	1
RNA Biology	Journal	1
BioMed Research International	Journal	1
Journal of Nucleic Acids	Journal	1
Computers in Biology and Medicine	Journal	1
Molecular BioSystems	Journal	1
The Plant Journal: For Cell and Molecular Biology	Journal	1
Genome Research	Journal	1
International Conference on Intelligent Systems Design and Applications	Conference	1
BioChip Journal	Journal	1
Journal of Intelligent Learning Systems and Applications	Journal	1
